# Supplementary figures and images for: Evaluation of six regions for their potential as DNA barcodes in epiphyllous liverworts from Thailand
Source: PubMed Central journal article supplement — Appl Plant Sci. 2018 Aug 20;6(8):e01174. doi: 10.1002/aps3.1174 (PMC6110246; doi:10.1002/aps3.1174), 2018-08-20

**B**

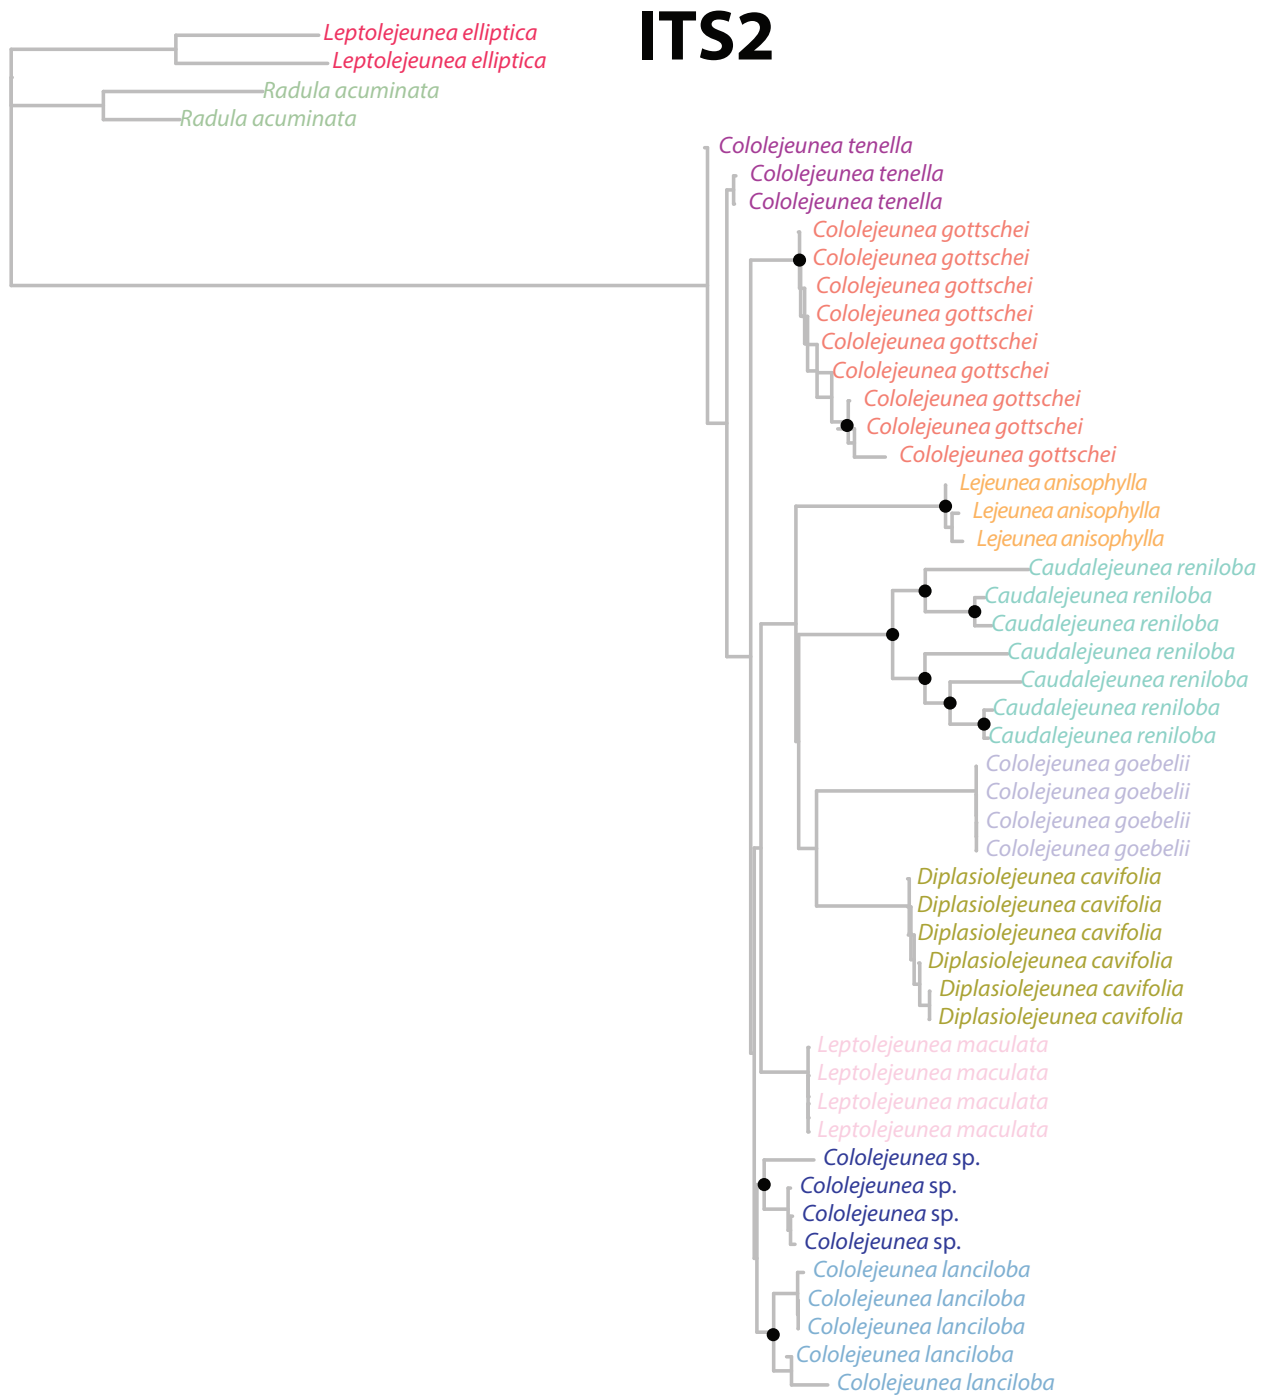



D

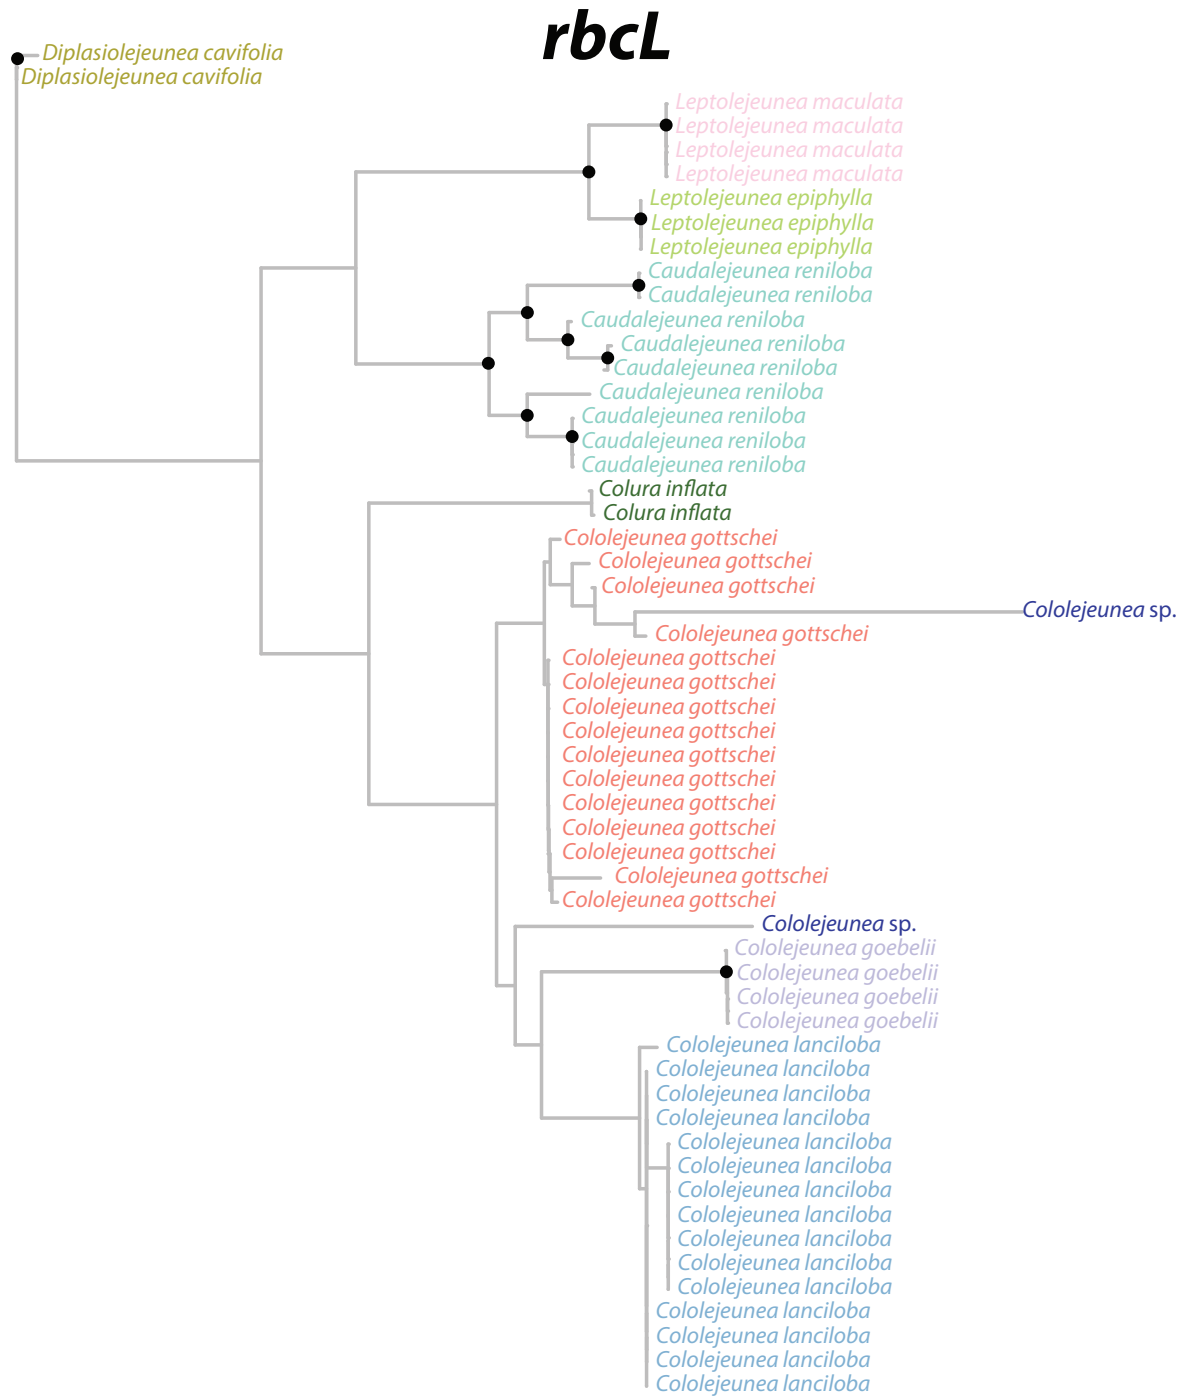

Supplement: APS3-6-e01174-s001.pdf [file APS3-6-e01174-s001.pdf]

**B**

**ITS2**

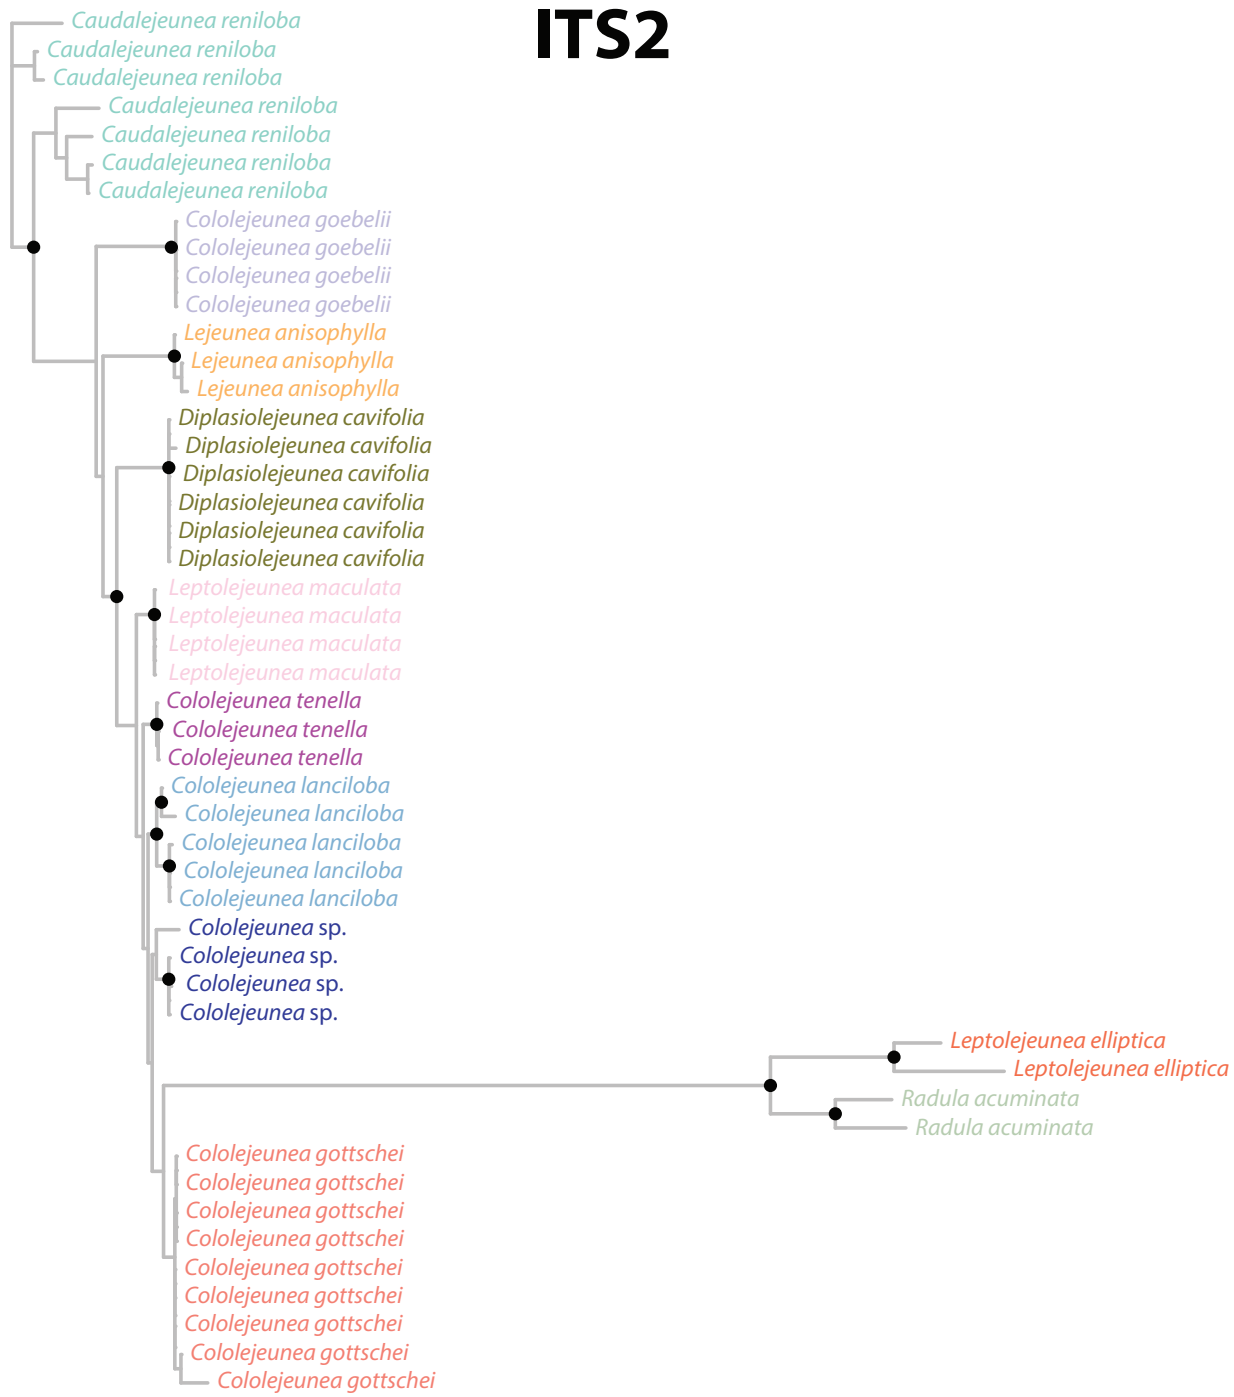

C

**psbA**

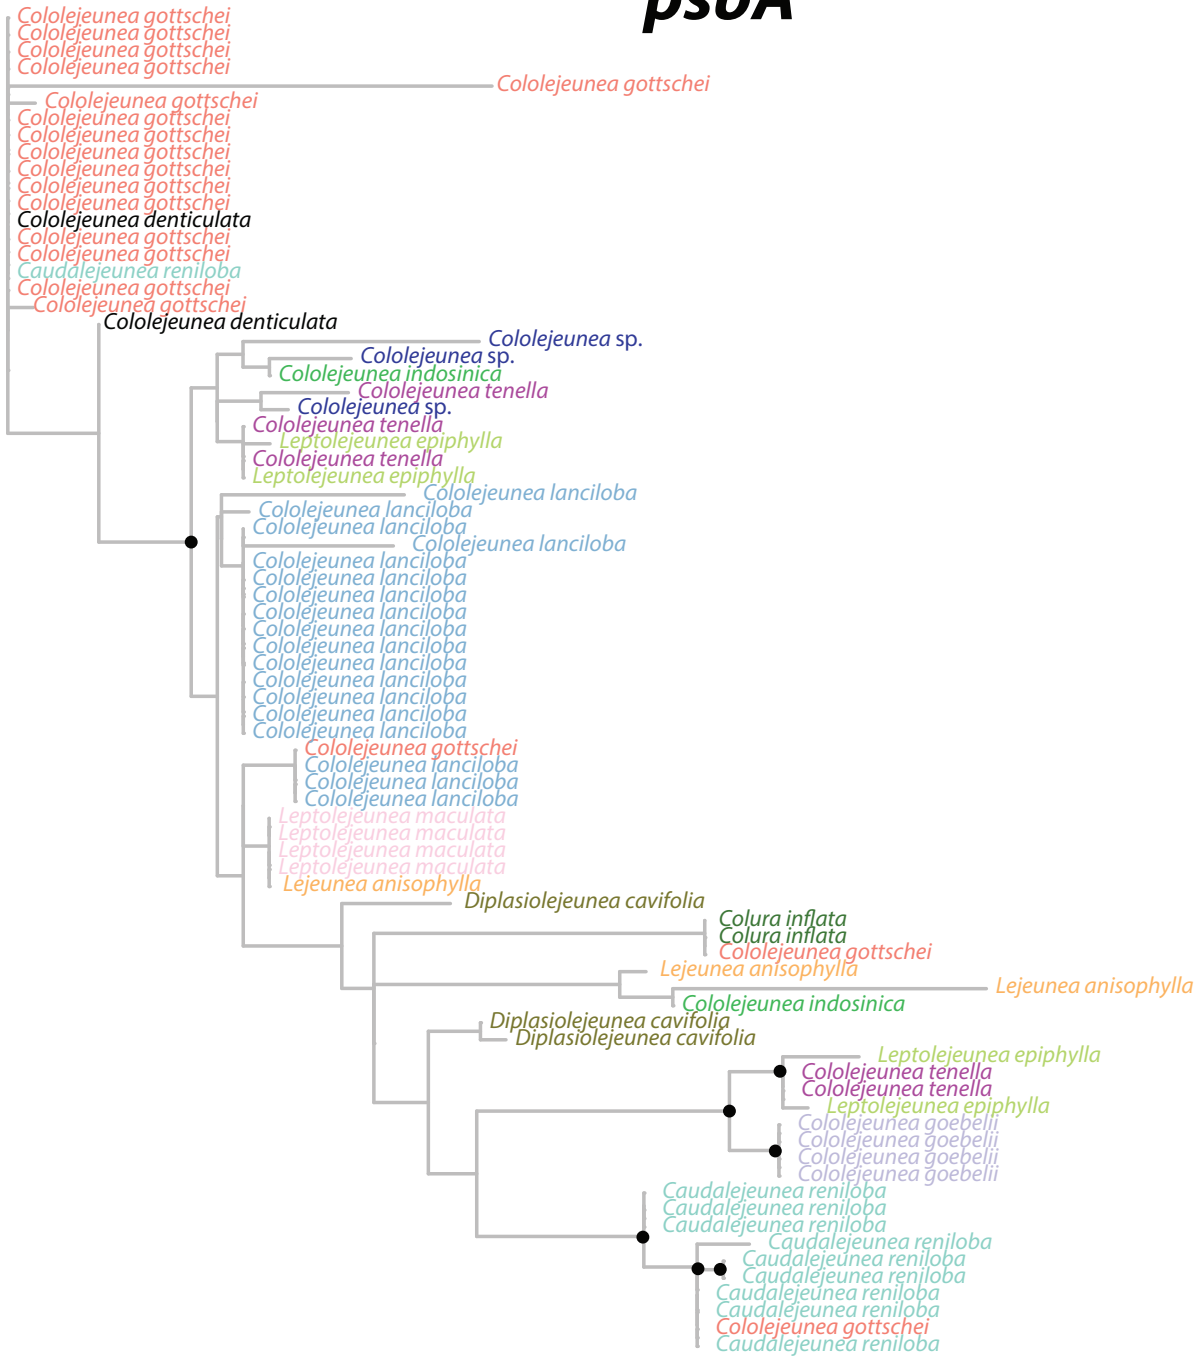

D

*rbcl*

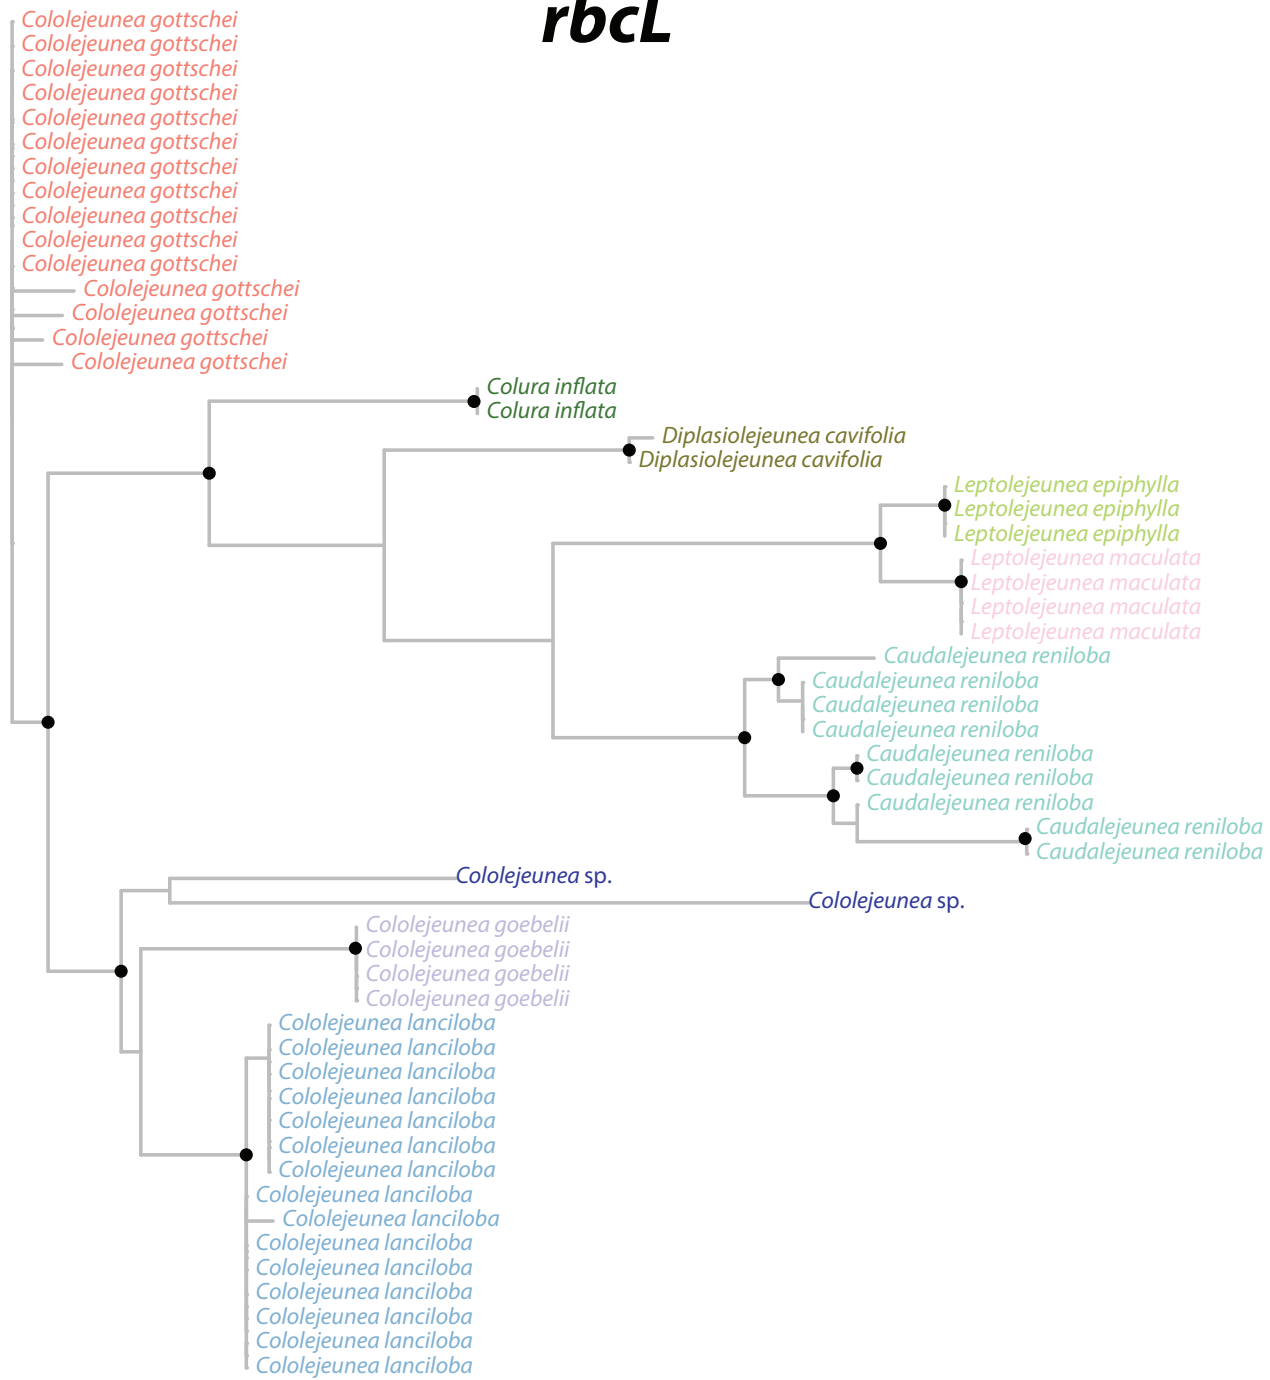

E

**trnL-F**

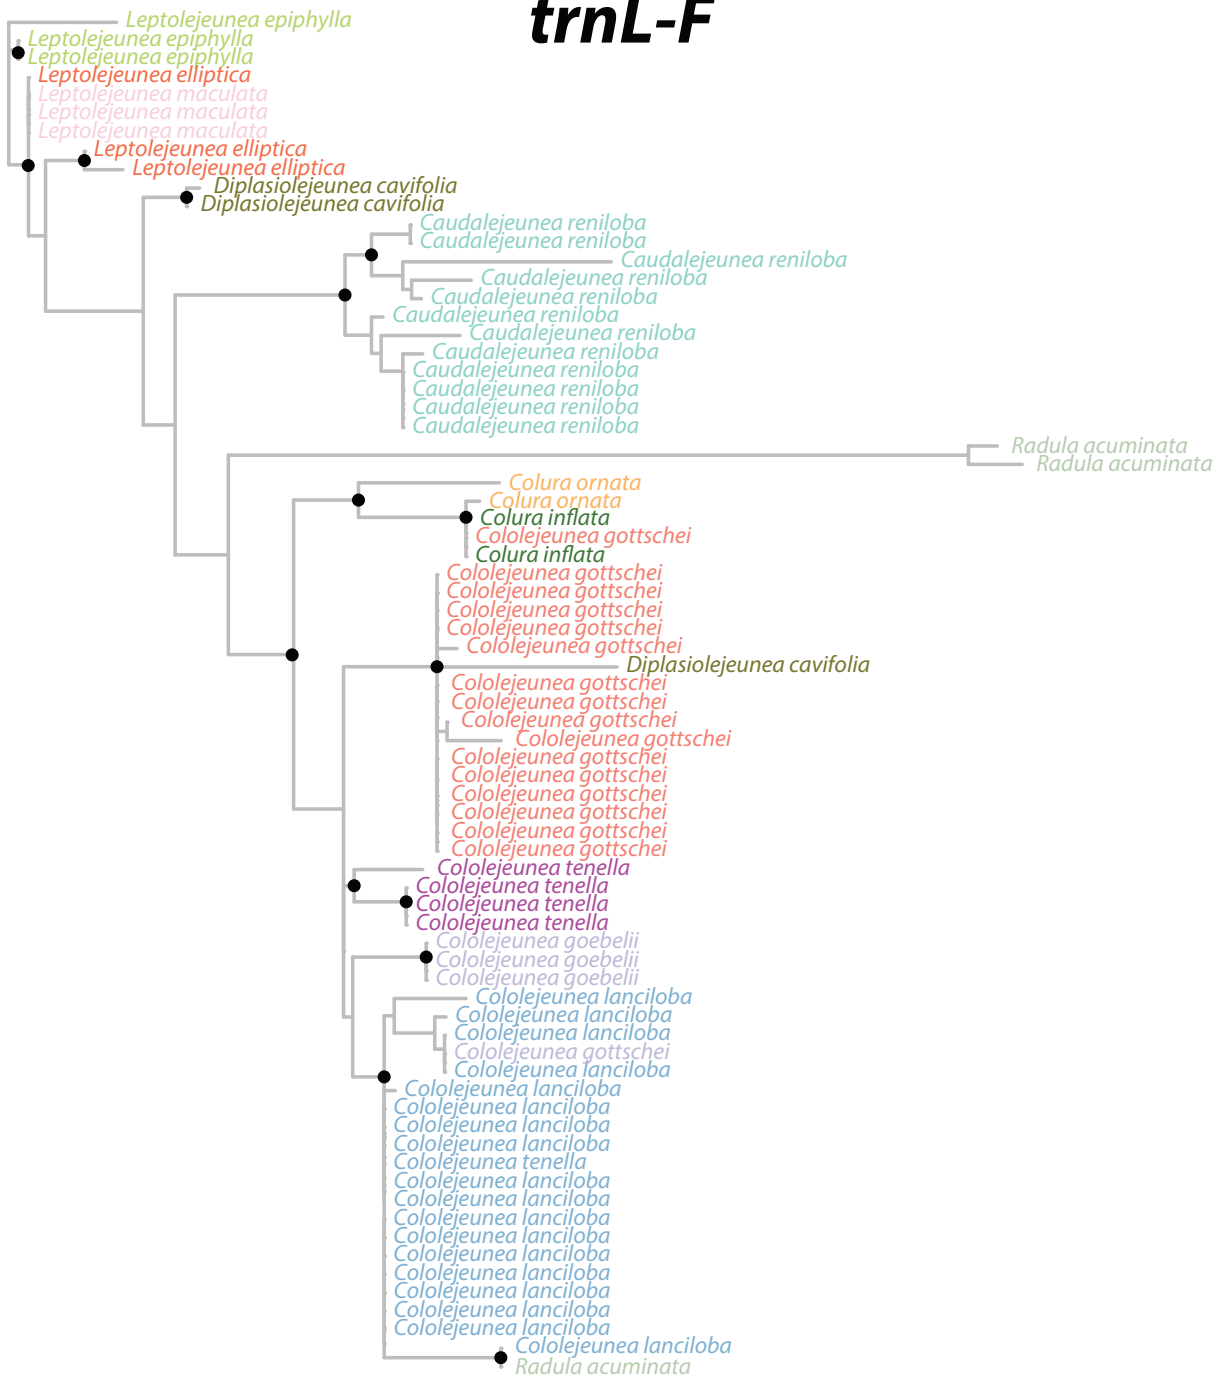

Supplement: APS3-6-e01174-s002.pdf [file APS3-6-e01174-s002.pdf]
